# Supplementary material for: Dy-Doped BiFeO3 thin films: piezoelectric and bandgap tuning
Source: Royal Society of Chemistry journal article supplement (doi:10.1039/d1ma01088c), 2022-01-01
Supplement: d1ma01088c1.pdf [file d1ma01088c1.pdf]

## Supporting information

### Dy-doped BiFeO<sub>3</sub> thin films: piezoelectric and bandgap tuning

Quentin Micard, Samuel Margueron, Ausrine Bartasyte, Guglielmo G. Condorelli, and Graziella Malandrino

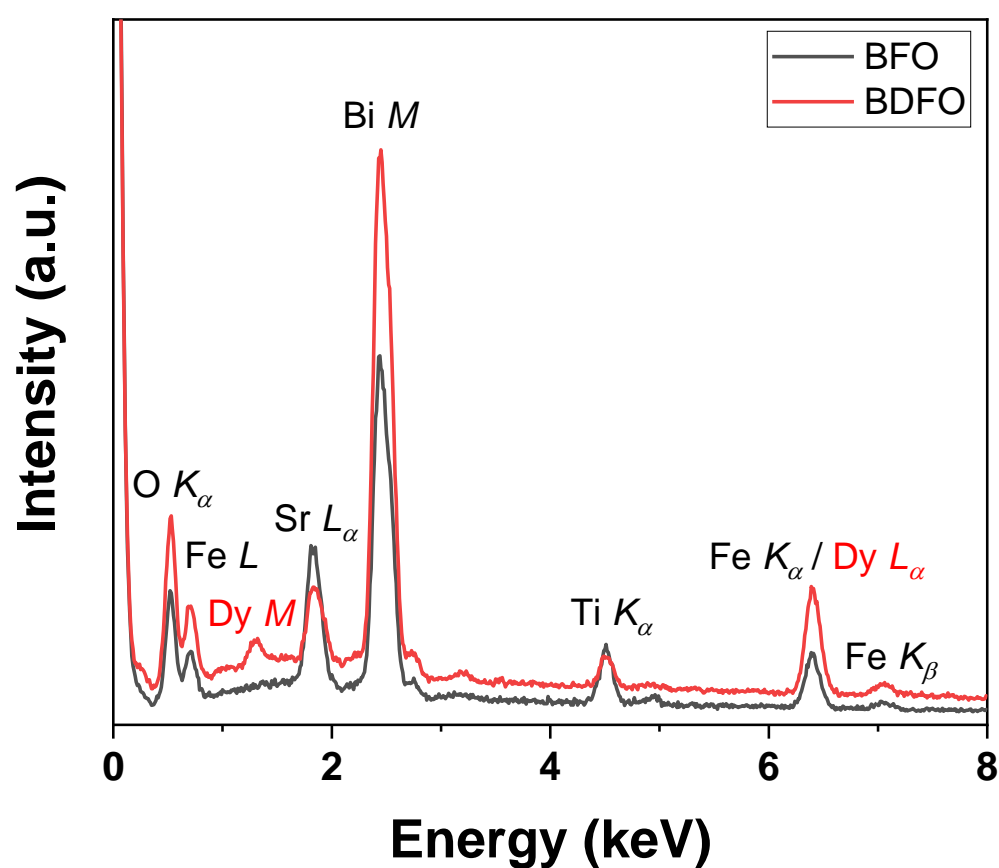

Fig. S1. EDX spectra of pure BFO and BDFO-11% films.

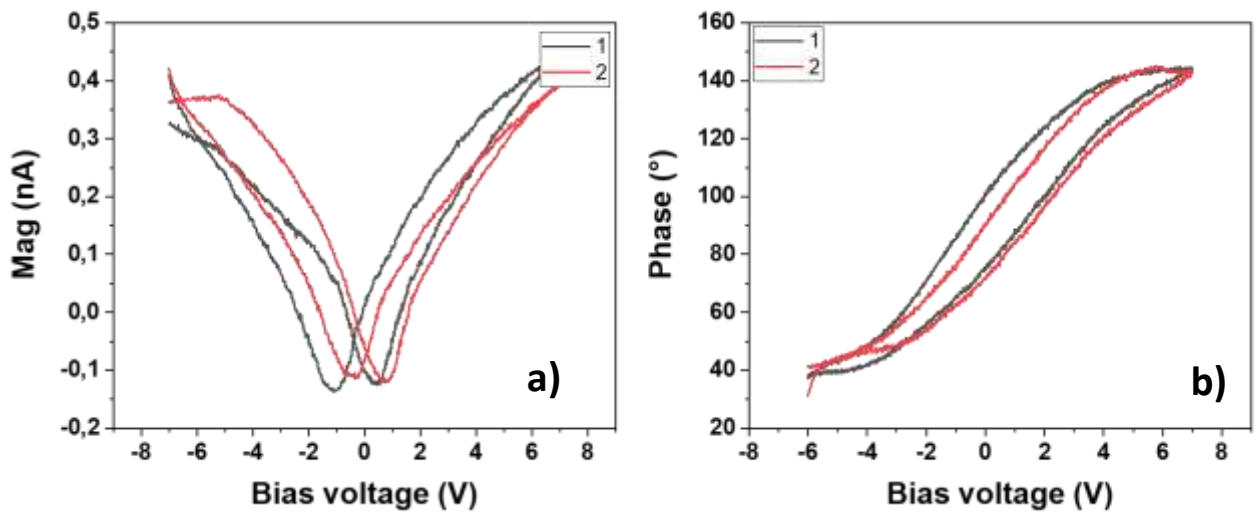

**Fig. S2.** PFS spectroscopy of two different BDFO-6% films (sample 1 in black and sample 2 in red): a) films piezoelectric response (Mag) and b) phase switching.

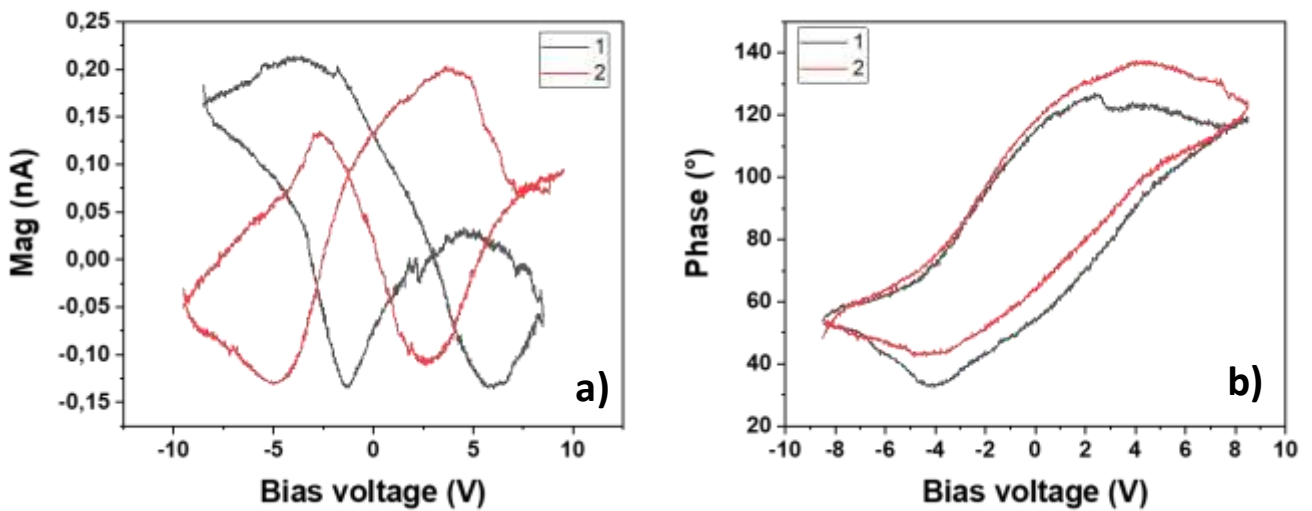

**Fig. S3.** PFS spectroscopy of two different BDFO-8% films (sample 1 in black and sample 2 in red): a) film piezoelectric response (Mag) and b) phase switching.

## BDFO-6%

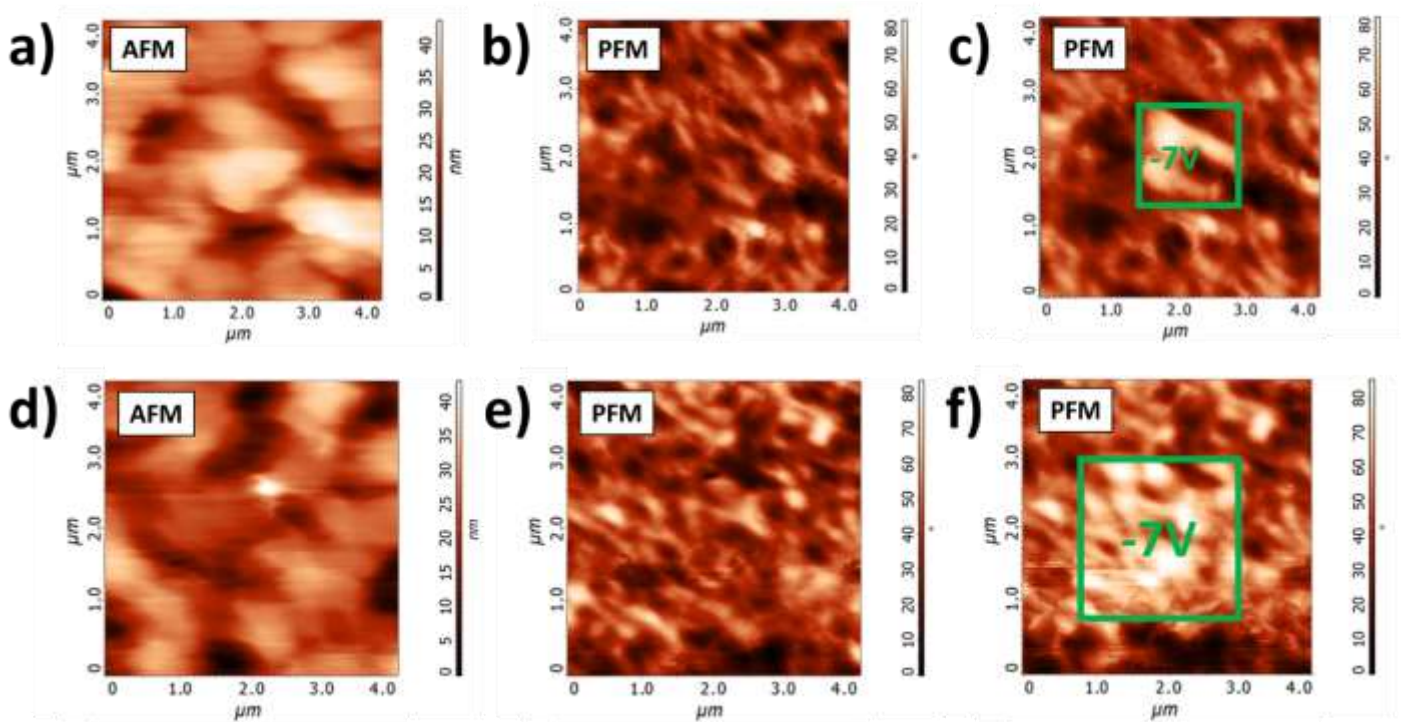

**Fig. S4.** BDFO-6% films: a) AFM topography scan, b) PFM phase scan before applying +7V bias voltage c) PFM phases scan after applying + 7V bias voltage of sample 1; d) AFM topography scan, e) PFM phase scan before applying + 7V bias voltage, f) PFM phases scan after applying + 7V bias voltage of sample 2.
